# Supplementary material for: Detection and localization of viral infection in the pancreas of patients with type 1 diabetes using short fluorescently-labelled oligonucleotide probes
Source: PubMed Central journal article supplement (PMC5355040; doi:10.18632/oncotarget.14896), 2017-01-29
Supplement: oncotarget-08-12620-s001.pdf [file oncotarget-08-12620-s001.pdf]

## Detection and localization of viral infection in the pancreas of patients with type 1 diabetes using short fluorescently-labelled oligonucleotide probes

### Supplementary Material

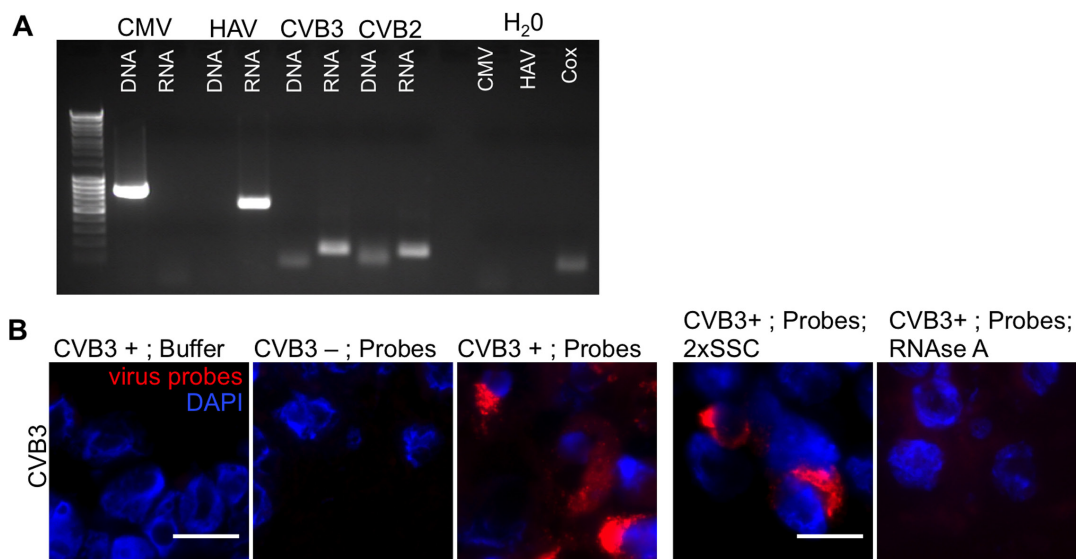

**Figure S1.** Specificity of viral RNA probes

**(A) Confirmation of viral-infection in the probe sensitivity test of Fig.2.** DNA and RNA of CMV, HAV, CVB3 and CVB2 were isolated and analyzed for the presence of viral genome. Each sample was processed in parallel with or without DNase digestion. **(B)** CVB3 infected or uninfected FFPE human islets were either stained with buffer or CVB\_1 oligos (left panel) or treated with 100ug/ml RNase A or 2xSSC Buffer (control) for 1h at 37°C before hybridization with RNA FISH probes (right panel). Nuclei were stained with DAPI (blue); scale bar depicts 10µm.

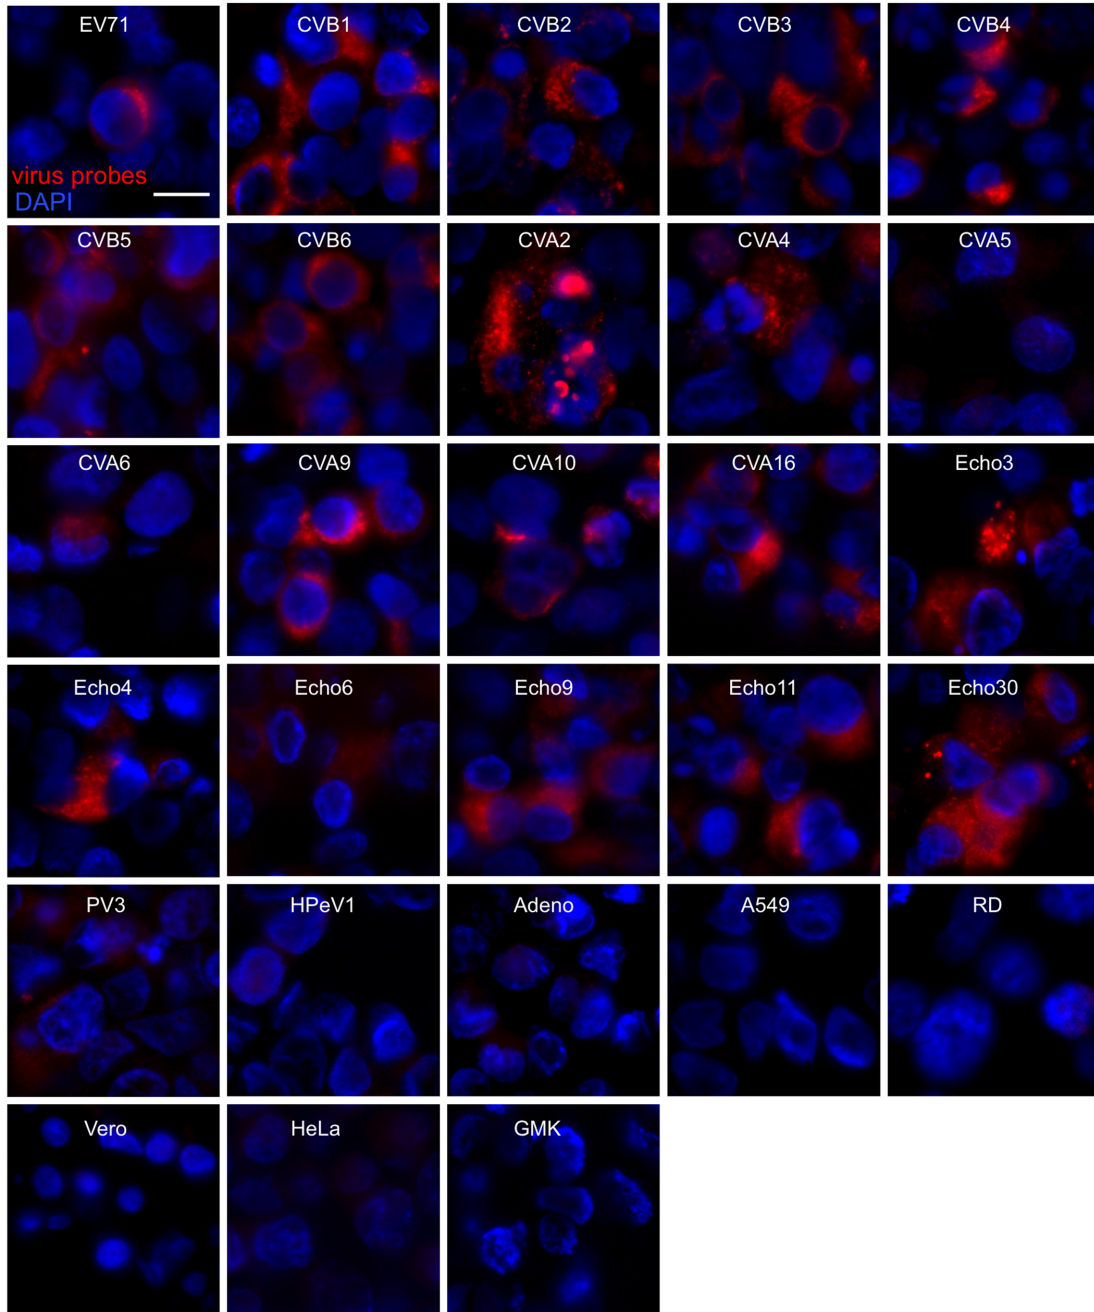

**Figure S2.** Summary of custom RNA oligonucleotide staining of different picornaviridae and control viruses. **Representative images of the viral RNA (red) staining on the cell array shown in Table 1.** Nuclei were stained with DAPI (blue), scale bar depicts 10 $\mu$ m.

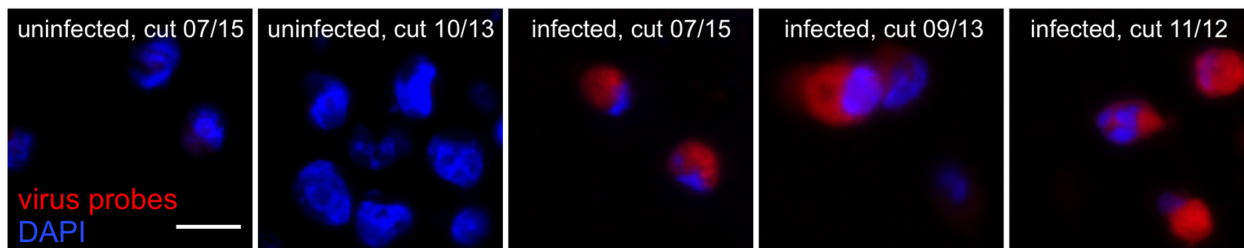

**Figure S3.** RNA-oligonucleotide labelling is consistent despite sample conditions  
 GMK cells FFPE sections of different age from non-infected (2015 and 2013) and CVB1-infected (2015, 2013 and 2012) were probed for viral RNA (red). Nuclei were stained with DAPI (blue); scale bar depicts 10 $\mu$ m.

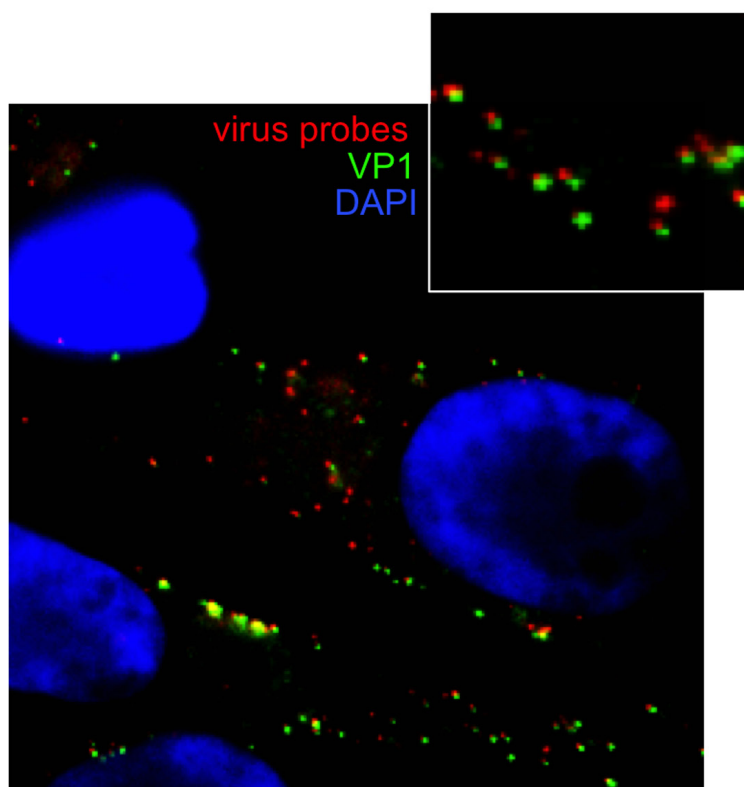

**Figure S4.** Coupling RNA-oligonucleotide labelling and immunohistochemistry  
 Magnified and enhanced image from Fig.4B, middle panel showing colocalization of VP1 (green) and viral RNA oligonucleotide probes (red).

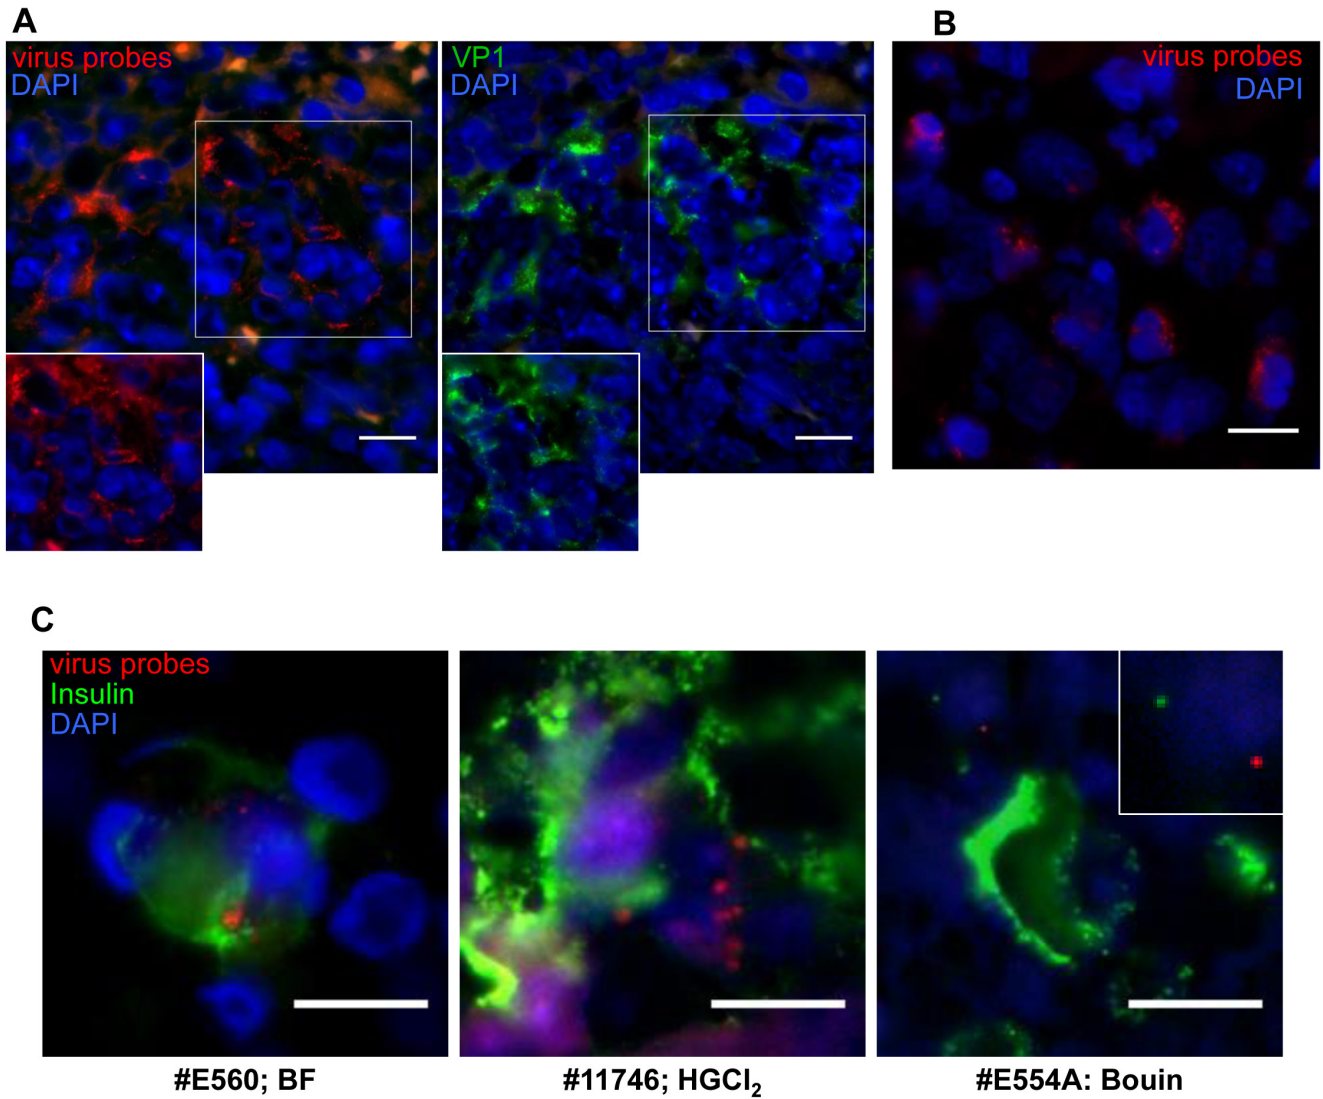

**Figure S5.** Custom viral RNA oligonucleotides bind tissue- and fixative-independent

**(A) Detection of viral RNA (red) and viral protein 1 (VP1) (green) in the same region of an FFPE spleen sample.** Tissue was first stained for viral RNA, analyzed and probed for VP1. **(B)** CVB-infected neonatal heart FFPE section was tested positive for viral RNA with fluorescent-labeled oligonucleotides (red). **(C)** RNA-FISH probes perform independent of the fixative used in human pancreatic sections as shown in the concordance study (Table 3). Nuclei were stained with DAPI (blue); scale bar depicts 10 $\mu$ m.

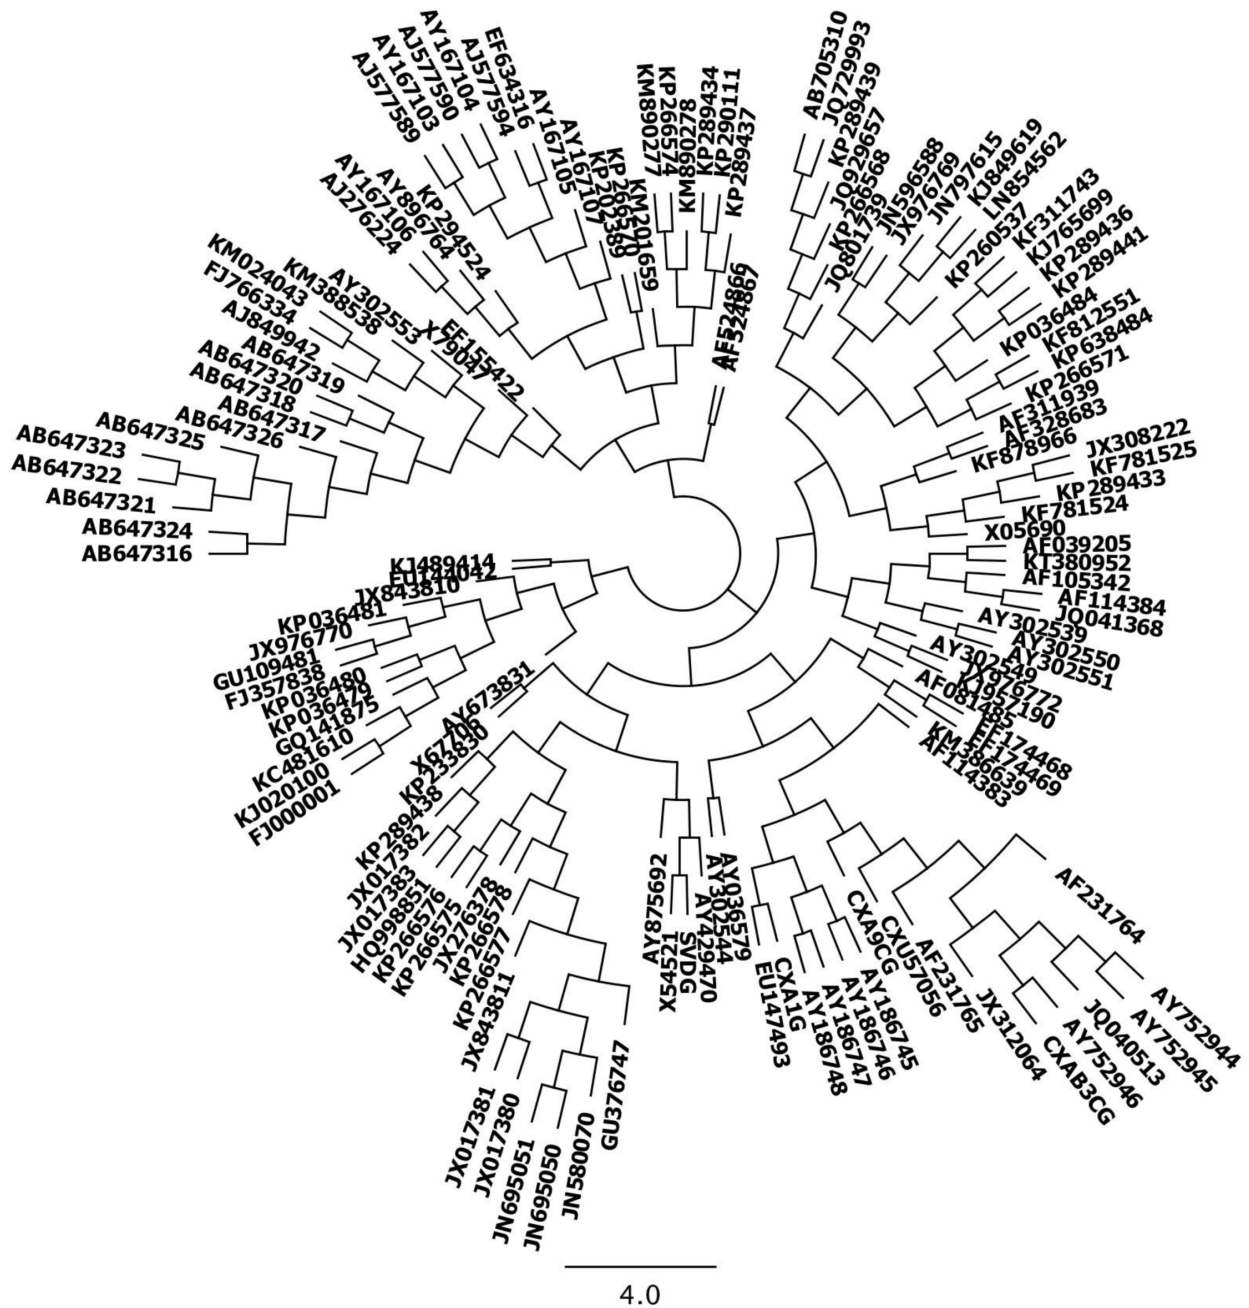

**Figure S6.** Genome alignment.  
 Enterovirus genome alignment for the design of CVB\_2 and CVB\_3 probe sets (Geneious version (9.1.5) (<http://www.geneious.com>) [48]).

**Table S1: Counted fluorescent spots of RNA-FISH sensitivity test**

| Dilution  | HEK293 (total spots) | CM9 (total spots) | HEK293 (dots/cell) | CM9 (dots/cell) |
|-----------|----------------------|-------------------|--------------------|-----------------|
| $10^2$    | 7378                 | 387               | 19,80656173        | 0,525101759     |
| $10^1$    | 1025                 | 161               | 2,282483251        | 0,259821157     |
| $10^0$    | 98                   | 103               | 0,289588584        | 0,130535155     |
| $10^{-1}$ | 51                   | 39                | 0,112774084        | 0,058245893     |
| $10^{-2}$ | 39                   | 20                | 0,096695942        | 0,025043732     |
| $10^{-3}$ | 18                   | 33                | 0,033731891        | 0,048228387     |
| $10^{-4}$ | 8                    | 16                | 0,02117113         | 0,022302297     |
| $10^{-5}$ | 8                    | 10                | 0,017853038        | 0,014837777     |
| $10^{-6}$ | 14                   | 23                | 0,036317252        | 0,029477528     |
| $10^{-7}$ | 6                    | 20                | 0,018873785        | 0,028428992     |
| $10^{-8}$ | 9                    | 19                | 0,022544999        | 0,026538136     |

CM 9 and HEK 293 were infected with a dilution series (MOI  $10^2$ – $10^{-8}$ ) of CVB3 and stained with custom-designed FISH probes (Fig.3). Ten single images were acquired for each dilution and single fluorescent spots as well as number of cells were manually counted (ImageJ).

**Table S2: CT values of CVB and housekeeping genes**

| MOI       | CM CVB     |          | CM HK      |          | HEK 293 CVB |          | HEK 293 HK |          |
|-----------|------------|----------|------------|----------|-------------|----------|------------|----------|
|           | $C_T$ Mean | $C_T$ SD | $C_T$ Mean | $C_T$ SD | $C_T$ Mean  | $C_T$ SD | $C_T$ Mean | $C_T$ SD |
| $10^2$    | 19,1       | ± 0.2    | 23.2       | ± 0.1    | 18.8        | ± 0.1    | 20.4       | ± 0.1    |
| $10^1$    | 22,2       | ± 0.0    | 23.4       | ± 0.0    | 22.9        | ± 0.0    | 21.1       | ± 0.0    |
| $10^0$    | 26,3       | ± 0.5    | 23.2       | ± 0.1    | 25.7        | ± 0.2    | 21.2       | ± 0.0    |
| $10^{-1}$ | 29,7       | ± 2.0    | 22.9       | ± 0.0    | 27.8        | ± 0.2    | 21.4       | ± 0.0    |
| $10^{-2}$ | 35,0       | ± 1.9    | 23.8       | ± 0.0    | 30.7        | ± 0.5    | 22.5       | ± 0.0    |
| $10^{-3}$ | 33,9       | ± 0.7    | 23.7       | ± 0.1    | 29.0        | ± 0.2    | 21.0       | ± 0.0    |
| $10^{-4}$ | 34,9       | ± 2.1    | 23.1       | ± 0.0    | 30.4        | ± 0.5    | 21.7       | ± 0.0    |
| $10^{-5}$ | 33,4       | ± 1.7    | 22.6       | ± 0.0    | 31.1        | ± 0.6    | 21.4       | ± 0.0    |
| $10^{-6}$ | 31,5       | ± 2.0    | 23.3       | ± 0.0    | 31.9        | ± 0.5    | 21.6       | ± 0.9    |
| $10^{-7}$ | 28,5       | ± 1.9    | 22.6       | ± 0.1    | 37.2        | ± 1.8    | 23.2       | ± 0.1    |
| $10^{-8}$ | 37,5       | ± 0.6    | 23.8       | ± 0.1    | 32.9        | ± 1.5    | 20.7       | ± 0.0    |

CM9 and HEK 293 were infected with a dilution series (MOI  $10^2$ – $10^{-8}$ ) of CVB3. Viral RNA was extracted and analyzed with PCR (Fig.3). Shown are the  $C_T$  and SD (standard derivation) values for the respective viral RNA (CVB) and housekeeping gene (HK,  $\beta$ 2-Microglobulin).

**Table S3: CVB\_1 set sequences**

| #  | Probe 5' → 3'        | Sequence 5' → 3'      |
|----|----------------------|-----------------------|
| 1  | caacccacaggctgttttaa | ttaaacagcctgtgggttg   |
| 2  | aacaggcgcaaaaggtacc  | ggtaccttgtgcgctgtt    |
| 3  | ctattgatactcagtcggg  | cccggactgagatcaatag   |
| 4  | taacgaacgctttccttc   | gaaggagaaagcgttcgta   |
| 5  | gtagtgctgagcgaaacact | agtgttcgctcagcactac   |
| 6  | tgactcatcgacctgatcta | tagatcaggtcgatgagtca  |
| 7  | caccatgtctgtattagagc | gctctaatacagacatggg   |
| 8  | aggactaccaactagctcaa | ttgagctagtggtagctct   |
| 9  | ttaggattagccgattcag  | ctgaatgctggtaaatcctaa |
| 10 | gaaacacggacacccaaagt | actttgggtgtccgtgttc   |
| 11 | caattgtcaccataagcagc | gctgcttatggtgacaattg  |
| 12 | ggccaatccaatagctatat | atatagctattggattggcc  |
| 13 | gtagatgttgccacacgta  | tacgtgtggcaaacatctac  |
| 14 | tgtccattgcatcatcttc  | gaagatgatgcaatggaaca  |
| 15 | agtgattcttcaggagggt  | aacctctgaaagaatcact   |
| 16 | gcgtactttctgcaatagtg | cactattgcagaaagtacgc  |
| 17 | ctgtatgtaattgctcatct | agatgagcaattacatacag  |
| 18 | ggtcaatacggcatttgga  | tccaaatgccgtattgaacc  |
| 19 | ggcatagatcgccataatc  | gattatggacgatctatgcc  |
| 20 | gaaaccattggcagaacaa  | ttgttctgccaatgggttc   |
| 21 | gacatgggcatgtttatctt | aagataaacatgcccatgtc  |
| 22 | gacatgtttctcaatttgga | tccaaattgagaaacatgtc  |
| 23 | ctgaactctcattccggtt  | aaccggaatgagaagttcag  |
| 24 | tcattaacctccacttctc  | gaggaagtggaggttaatga  |
| 25 | tgccacctaggtttaggaag | cttcctaaacctagggtggca |
| 26 | gttgacataagcattctct  | agagaatgcttatgtacaac  |
| 27 | ctgggtgtgtgatgactgg  | ccagtcatcaacacaccaag  |
| 28 | tgtgtgtgacatttcctat  | ataggaaatgtcaacacaca  |
| 29 | tccagtttcattggttcagt | actgaaccaatgaaactgga  |
| 30 | catactgtccatacattcc  | ggaatgtatggacaagtatg  |
| 31 | gtcaatgtagttgtctctt  | aagagacaaactacattgac  |
| 32 | caagtcaatccctttgtaca | tgtacaaagggattgacttg  |
| 33 | catcaccatagcgatcatc  | gatgatcgcatatggtgatg  |
| 34 | gtactgtcatctgctctaa  | ttagagcagatgaacagtac  |
| 35 | tcgtgtatgtcttcatggg  | cccatgaaagacatacacga  |
| 36 | atctgggtgttctttggat  | atccaaagaacaccaagat   |
| 37 | tgaactcctcatattcgtgc | gcacgaatatgaggagtca   |
| 38 | agtagggtaagccaatcta  | tagattggctaacctact    |
| 39 | ccgttatctggttcggttag | ctaaccgaaccagatacgg   |
| 40 | cgaatgctggagaatttacc | gggtaaattctccgcattcg  |

Sequences of probes and respective viral target regions of set CVB\_1. Designed with Stellaris® RNA FISH Probe Designer (Biosearch Technologies, Inc., Petaluma, CA).

**Table S4: CVB\_2 set sequences**

| #  | Probe 5'→ 3'           | Sequence 5' → 3'      |
|----|------------------------|-----------------------|
| 1  | aggtttctcgaagtaattgg   | ccaattactctcgagaaacct |
| 2  | tgatctacactggggttg     | cacaaccccagtgtagatca  |
| 3  | ttacgacagactgccactg    | cagtgggcagtctgtcgtaa  |
| 4  | caaagtagtcggttccgctg   | cagcggaaaccgactacttg  |
| 5  | tgcttaccattgtcactgtt   | aacagtgacaatggaagca   |
| 6  | ccaacatcccatatgacgtg   | cacgtcatatgggatgttgg  |
| 7  | acatgagctttgcacatcag   | ctgatgtgcaaagctcatgt  |
| 8  | acggcatttggacttgaact   | agttcaagtccaaatgccgt  |
| 9  | tcagtcggggtaacagaag    | cttctgttaccgggactga   |
| 10 | gtttctcgaagtaattggcc   | ggccaattactctcgagaaac |
| 11 | tagctcaatagactctcgc    | gcgaagagtctattgagcta  |
| 12 | ctgctccgcagttaggatta   | taatcctaactcggagcag   |
| 13 | agcagccagttcaagaataa   | ttattctgaactggctgct   |
| 14 | ggccaatccaatagctatat   | atatagctattggattggcc  |
| 15 | tgtgtggttattgtggagtt   | aactccacaataaccacaca  |
| 16 | gttgaaggggaatgcctgacc  | ggtcaggcattccctcaac   |
| 17 | gggttgctagtaaactca     | tgagtftactagcacaacc   |
| 18 | tgtatggcatcactatggtg   | caccatagtgatgccataca  |
| 19 | tgtgaagttgtagtgcctaa   | ttaggcactacaactcaca   |
| 20 | aaattgcgtactccctggtg   | caccagggagtacgcaattt  |
| 21 | cctgggtatattcactactagg | cctagtatgaatataaccagg |
| 22 | cacaacggagtccacttctg   | cagaagtggactccgttctg  |
| 23 | aacatttccatttggctcgtt  | accgaccaaattggaatgtt  |
| 24 | ggcattaatggctactggaa   | ttccagtgaccattaatgcc  |
| 25 | acagaaaagtcggtgcaagc   | gcttgcaacgacttttctgt  |
| 26 | tttctgagttgctaggcca    | tggacctagcaactcagaaa  |
| 27 | ggactcagaacgagtatggt   | accatactcgttctgagtcc  |
| 28 | ctacgcatttgcaccatttg   | caaatgggtgcaaatgcgtag |
| 29 | cactggcatgtcttctgcta   | tagcacaagacatgccagtg  |
| 30 | cctcacatataatgtgaccta  | taggtcacatataatgtgagg |
| 31 | gtggttacagtgtaaatgtc   | gacattaacactgtaaccac  |
| 32 | tggccctcgaagctaactg    | cagttagcttcgagggacca  |
| 33 | gggtagtattcactctcctg   | caggagagtgaatactacc   |
| 34 | aatcccagccaaaagcgtt    | aacgcttttgctcgggatt   |
| 35 | tcatcatggttctcaccac    | gtggtgagaacctatgatga  |

Sequences of probes and respective viral target regions of set CVB\_2. Designed with Stellaris® RNA FISH Probe Designer (Biosearch Technologies, Inc., Petaluma, CA).



**Table S5: CVB\_3 probe set sequences**

| #  | Probe 5' → 3'        | Sequence 5' → 3'      |
|----|----------------------|-----------------------|
| 1  | ggtagcgtgataccagagtg | cactctggtatcacggtacc  |
| 2  | gggtaacagaagtgcctgat | atcaagcacttctgttacc   |
| 3  | tagactcttcgaccatgtc  | gacatggtgcgaagagtcta  |
| 4  | tgaattctcatccactgca  | tgcaagtggatgaagaattca |
| 5  | gagccattctataaatttct | agaaattatagaatggctc   |
| 6  | acaaaatgcctttctctct  | agaagagaaaggcattttgt  |
| 7  | acctcgatgtcatatcaaa  | ttgatatgaacatcgaggt   |
| 8  | caacactctcatcacacgt  | acgtgtgatgaagagtgtg   |
| 9  | tcaagggagatctgacttg  | caagtcagatactccctga   |
| 10 | tgaacatctcagttaccagc | gctggtaactgagatgtca   |
| 11 | ctgggtgtaattgctagcac | gtgctagcaattaacaccag  |
| 12 | cattctctgggtgggtgtac | gtacaccaccaagagaatg   |
| 13 | gagaagccttgatgaccatt | aatggtcatcaaggcttctc  |
| 14 | aactcgatttctcctgttc  | gaacaaggagaaatcgagtt  |
| 15 | aggactgctggctctttatt | aataaagagccagcagctct  |
| 16 | gccaattgaccagcataatg | cattatgctggccaattggc  |
| 17 | tctgcagatctgagttcatc | gatgaactcagatctgcaga  |
| 18 | aacatcactggatcttgct  | agcaagataccagtgatgtt  |
| 19 | gctagcgtcatatccagaat | attctggatgacgctagc    |
| 20 | ttggtccatctgattgattc | gaatcaatcagatggaccaa  |
| 21 | cgttgtgccaggccaataag | cttattggcctggcacaacg  |
| 22 | aaaagagtccaaccacttcc | ggaagtgggtggactctttt  |
| 23 | ccctggatctgagtgaaat  | attcactcaagatccaggg   |
| 24 | gagctctgttgccacattac | gtaatgtggcaacagagctc  |
| 25 | tcgggaaattccaccacca  | tggtgggtgaaattcccga   |
| 26 | aggaatggattgcatgtt   | aacatgcaataccattacct  |
| 27 | cctgtggagtttgggattc  | gaatccaaaactccacagg   |
| 28 | atggtcagattgccaactc  | gagttggcaatctgaccata  |
| 29 | gacaatcgctgcactattgt | acaatagtgcgacgattgtc  |
| 30 | ctgcgatttccatcaagttg | caacttgatggaaatcgcag  |
| 31 | tcactttgagtgtctgcagg | cctgcagacactcaaagtga  |
| 32 | tggtttgcatagtgtctgct | agcagacactatgcaaacca  |
| 33 | aagttgcaccatcagtacc  | ggtactgatggtgacaactt  |
| 34 | tattgacatacgggtgggtg | caccaccccgatgtcaata   |
| 35 | gcattgcctatgctgatgaa | ttcatcagcataggcaatgc  |
| 36 | acggcatttggacttgaact | agttcaagtccaaatgccgt  |

Sequences of probes and respective viral target regions of set CVB\_3. Designed with Stellaris® RNA FISH Probe Designer (Biosearch Technologies, Inc., Petaluma, CA).
